# Supplementary figures and images for: Axon diodes for the reconstruction of oriented neuronal networks in microfluidic chambers
Source: Royal Society of Chemistry journal article supplement (doi:10.1039/c1lc20014c), 2011-01-01

Supplementary data 1. Peyrin et al.

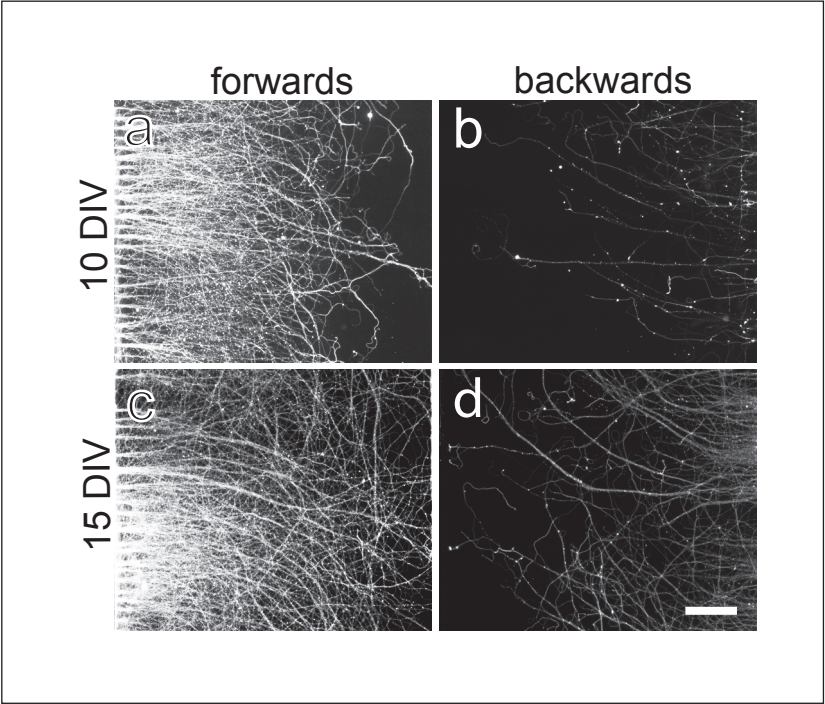

Supplement: c1lc20014c.pdf [file c1lc20014c.pdf]

Supplementary data 2. Peyrin et al.

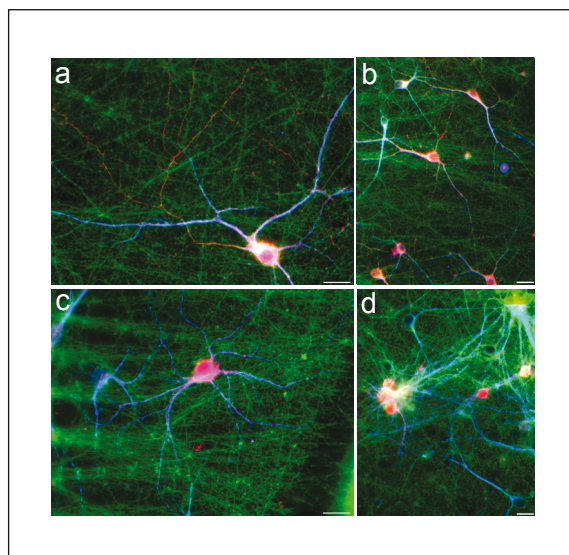

Supplement: c1lc20014c_2.pdf [file c1lc20014c_2.pdf]
